# Supplementary material for: Analysis of Covid-19 Data for Eight European Countries and the United Kingdom Using a Simplified SIR Model
Source: bioRxiv or medRxiv preprint supplement (doi:10.1101/2020.05.26.20114058), 2020-10-15
Supplement: Supplementary file [file media-1.pdf]

## Appendix A

The basic equations are:

$$\frac{dX_1}{dt} = -\alpha X_1 X_2 \quad (\text{A1})$$

$$\frac{dX_2}{dt} = \alpha X_1 X_2 - \gamma X_2 \quad (\text{A2})$$

The boundary conditions at  $t = 0$  are:

$$X_1(0) = (N - a) \text{ and } X_2(0) = a \quad (\text{A3})$$

Given these boundary conditions,  $X_1(t)$  and  $X_2(t)$  are related by (see (13) in Methods):

$$X_2(t) = N - a + \frac{N}{R} \log \left( \frac{X_1(t)}{N-a} \right) - X_1(t) \quad (\text{A4})$$

For small  $t$ , we can expand the log in (A4) as follows:

$$\log \left( \frac{X_1(t)}{N-a} \right) = \log \left[ 1 - \left( 1 - \left( \frac{X_1(t)}{N-a} \right) \right) \right] \sim - \left( 1 - \left( \frac{X_1(t)}{N-a} \right) \right) \quad (\text{A5})$$

which, when substituted into (A4) gives, after some simple algebra,

$$X_2(t) = \frac{R-1}{R} \left[ N - X_1(t) \left( 1 - \frac{a}{(R-1)N} \right) \right] \sim \frac{R-1}{R} [N - X_1(t)] \quad (\text{A6})$$

Substituting these into (A1), we get the Logistic Equation:

$$\frac{dX_1}{dt} = -\gamma(R-1)X_1(t) \left[ 1 - \frac{X_1(t)}{N} \right] \quad (\text{A7})$$

whose solution, with the boundary condition (A3) is:

$$X_1(t) = \frac{N}{\left[ 1 + \frac{a}{N-a} e^{\gamma(R-1)t} \right]} \quad (\text{A8})$$

For small  $t$ , we can expand the denominator to get:

$$X_1(t) \sim N \left[ 1 - \frac{a}{N-a} e^{\gamma(R-1)t} \right], \text{ t small} \quad (\text{A9})$$

Substituting into (A6) gives,

$$X_2(t) \sim \frac{(R-1)aN}{R(N-a)} e^{\gamma(R-1)t} \quad (\text{A10})$$

This analysis shows that for small  $t$ ,  $X_1(t)$  decreases exponentially from its initial value of  $(N - a)$  and this decrease feeds an exponential increase in  $X_2(t)$ .

(A10) also shows that the coefficient of  $t$  in the exponent of  $X_2(t)$  is  $\gamma(R - 1)$ . (A11)
